# Supplementary material for: Female Sexual Dysfunction and Pelvic Floor Muscle Function Associated with Systemic Sclerosis: A Cross-Sectional Study
Source: MDPI journal article supplement (doi:10.3390/ijerph19010612), 2022-01-05
Supplement: s1 [file s1]

# **Sexual Function and Pelvic Floor Function in Women with Systemic Sclerosis: A Cross-sectional Study**

*– supplementary material –*

## **SUPPLEMENTARY METHODS**

### **Exclusion criteria**

Exclusion criteria for both groups (in SSc patients as a comorbid condition) comprised severe chronic diseases as defined by World Health Organization (WHO) (1), namely: active neoplasia (recent diagnosis of cancer with ongoing treatment), severe cardiovascular disease, chronic respiratory disease, severe neurological and mental disorder.

### **Scleroderma Health Assessment Questionnaire**

The modified Scleroderma Health Assessment Questionnaire (SSc HAQ) has been validated in 1997 (2) and was proposed as a more specific version of the HAQ for SSc by adding five specific patient-reported visual analog scales (VAS) to assess gastrointestinal and pulmonary symptoms, Raynaud's phenomenon, digital ulcers, and overall disease severity. These five aspects are graded from 0 (no interference with patient's activity) to 3 (very severe limitation). The mean of these five scores has been calculated as the "SHAQ" score (2). An aggregated score called "Global SHAQ" ranging from 0 (no disability) to 3 (maximum disability) was calculated according to Georges et al. (3) as follows: SSc HAQ = (8 HAQ domains scores + 5 VAS scores) divided by 13.

## SUPPLEMENTARY RESULTS

**Supplementary Table S1. Sexual function and pelvic floor function in women with SSc and healthy controls**

| Parameters (score range worst-best)                    | SSc<br>(n = 90)  | Healthy Controls<br>(n = 90) | p-value                     |
|--------------------------------------------------------|------------------|------------------------------|-----------------------------|
| <b>FSFI total (range 2-36)</b>                         | 19.4 (3.9-26.8)  | 30.2 (23.1-32.9)             | <b><i>p</i> = 0.0002</b>    |
| FSFI desire (range 1.2-6)                              | 2.4 (1.2-3.6)    | 3.6 (3.0-4.8)                | <b><i>p</i> = 0.0002</b>    |
| FSFI arousal (range 0-6)                               | 2.7 (0.5-4.7)    | 5.1 (4.1-5.7)                | <b><i>p</i> = 0.0002</b>    |
| FSFI lubrication (range 0-6)                           | 3.7 (0.0-5.3)    | 5.7 (3.6-6.0)                | <b><i>p</i> = 0.0002</b>    |
| FSFI orgasm (range 0-6)                                | 3.2 (0.0-4.8)    | 5.2 (3.6-6.0)                | <b><i>p</i> = 0.0002</b>    |
| FSFI satisfaction (range 0.8-6)                        | 3.2 (1.0-5.2)    | 5.2 (3.6-6.0)                | <b><i>p</i> &lt; 0.0001</b> |
| FSFI pain (range 0-6)                                  | 3.6 (0.0-5.4)    | 6.0 (4.3-6.0)                | <b><i>p</i> = 0.0002</b>    |
| <b>BISF-W total (range -16-75)</b>                     | 14.3 (2.1-35.1)  | 38.2 (19.3-46.2)             | <b><i>p</i> = 0.0002</b>    |
| BISF-W thoughts/desire (range 0-12)                    | 3.3 (1.0-5.9)    | 5.3 (3.0-6.9)                | <b><i>p</i> = 0.0012</b>    |
| BISF-W arousal (range 0-12)                            | 4.3 (0.3-7.3)    | 7.0 (5.3-9.3)                | <b><i>p</i> = 0.0002</b>    |
| BISF-W frequency of sexual activity (range 0-12)       | 1.7 (0.3-4.0)    | 3.6 (1.8-5.3)                | <b><i>p</i> = 0.0006</b>    |
| BISF-W receptivity/initiation (range 0-15)             | 5.0 (0.0-9.0)    | 10.0 (6.0-11.0)              | <b><i>p</i> = 0.0002</b>    |
| BISF-W pleasure/orgasm (range 0-12)                    | 2.5 (0.0-5.8)    | 5.5 (3.3-7.3)                | <b><i>p</i> = 0.0005</b>    |
| BISF-W relationship satisfaction (range 0-12)          | 6.0 (2.0-9.0)    | 9.0 (6.0-11.0)               | <b><i>p</i> = 0.0002</b>    |
| BISF-W problems affecting sexual function (range 16-0) | 4.4 (3.0-6.6)    | 2.7 (1.8-5.3)                | <b><i>p</i> &lt; 0.0001</b> |
| SFQ-28 desire (range 5-31)                             | 17.0 (12.0-20.0) | 21.0 (17.0-23.0)             | <b><i>p</i> = 0.0002</b>    |
| SFQ-28 arousal sensation (range 4-20)                  | 10.0 (8.0-13.0)  | 12.0 (9.0-15.0)              | <b><i>p</i> = 0.0022</b>    |
| SFQ-28 arousal lubrication (range 2-10)                | 5.0 (4.0-7.0)    | 8.0 (6.0-9.0)                | <b><i>p</i> = 0.0002</b>    |
| SFQ-28 arousal cognitive (range 2-10)                  | 5.0 (4.0-6.0)    | 7.0 (5.0-8.0)                | <b><i>p</i> = 0.0002</b>    |
| SFQ-28 orgasm (range 1-15)                             | 10.0 (6.0-12.0)  | 12.0 (10.0-13.0)             | <b><i>p</i> = 0.0002</b>    |
| SFQ-28 pain (range 2-15)                               | 12.0 (9.5-15.0)  | 15.0 (13.0-15.0)             | <b><i>p</i> = 0.0002</b>    |
| SFQ-28 enjoyment (range 6-30)                          | 19.0 (12.5-24.0) | 23.0 (20.0-25.0)             | <b><i>p</i> &lt; 0.0001</b> |
| SFQ-28 partner (range 2-10)                            | 9.0 (8.0-10.0)   | 10.0 (9.0-10.0)              | <b><i>p</i> = 0.0014</b>    |
| <b>SQoL-F (range 0-100)</b>                            | 61.1 (34.4-81.1) | 91.1 (70.0-96.7)             | <b><i>p</i> &lt; 0.0001</b> |
| <b>PISQ-12 (range 48-0)</b>                            | 13.0 (9.0-17.0)  | 7.0 (5.0-12.0)               | <b><i>p</i> = 0.0002</b>    |
| <b>PFIQ-7 total (range 300-0), mean ± SD</b>           | 31.8 ± 48.3      | 6.2 ± 11.8                   | <b><i>p</i> = 0.0002</b>    |
| PFIQ-7 bladder/urine (range 100-0)                     | 14.6 ± 23.7      | 3.9 ± 8.3                    | <b><i>p</i> = 0.0006</b>    |
| PFIQ-7 bowel/rectum (range 100-0)                      | 11.6 ± 22.7      | 1.8 ± 4.8                    | <b><i>p</i> = 0.0116</b>    |
| PFIQ-7 vagina/pelvis (range 100-0)                     | 5.7 ± 12.9       | 0.9 ± 3.5                    | <b><i>p</i> = 0.0011</b>    |

**Acronyms:** Data are presented as median (IQR), if not stated otherwise. Statistically significant differences ( $p < 0.05$ ) are marked in bold. The number of respondents to the SFQ-28 questionnaire was 61 for SSc patients and 75 for healthy women; IQR, inter-quartile range; SD, standard deviation; SSc, systemic sclerosis; FSFI, Female Sexual Function Index; BISF-W, Brief Index of Sexual Function for Women; SFQ-28; Sexual Function Questionnaire; SQoL-F, Sexual Quality of Life - Female; PISQ-12, Pelvic Organ Prolapse/Urinary Incontinence Sexual Questionnaire short form; PFIQ-7, Pelvic Floor Impact Questionnaire – short form 7.

**Table S2. Spearman's and Pearson's\* correlation coefficients of sexual function and pelvic floor function with disease-related laboratory and clinical features SSc patients**

|                      |   | BISF-W<br>D1   | BISF-W<br>D2   | BISF-W<br>D3   | BISF-W<br>D4   | BISF-W<br>D5   | BISF-W<br>D6   | BISF-W<br>D7  | SFQ28<br>Desire | SFQ28<br>AS    | SFQ28<br>AL    | SFQ28<br>AC    | SFQ28<br>Orgasm | SFQ28<br>Pain  | SFQ28<br>Enjoym<br>ent | SFQ28<br>Partner |
|----------------------|---|----------------|----------------|----------------|----------------|----------------|----------------|---------------|-----------------|----------------|----------------|----------------|-----------------|----------------|------------------------|------------------|
| ESSG                 | r | <b>-0.057</b>  | <b>-0.256</b>  | <b>-0.254</b>  | <b>-0.314</b>  | <b>-0.243</b>  | <b>-0.256</b>  | 0.064         | <b>-0.319</b>   | -0.242         | -0.207         | -0.123         | 0.003           | -0.189         | -0.240                 | -0.034           |
|                      | p | <b>0.600</b>   | <b>0.017</b>   | <b>0.018</b>   | <b>0.003</b>   | <b>0.023</b>   | <b>0.017</b>   | 0.555         | <b>0.012</b>    | 0.061          | 0.109          | 0.351          | 0.983           | 0.146          | 0.063                  | 0.792            |
|                      | n | <b>87</b>      | <b>87</b>      | <b>87</b>      | <b>87</b>      | <b>87</b>      | <b>87</b>      | <b>87</b>     | <b>61</b>       | 61             | 61             | 61             | 61              | 61             | 61                     | 61               |
| ESR                  | r | <b>-0.245</b>  | <b>-0.296</b>  | <b>-0.311</b>  | <b>-0.274</b>  | <b>-0.256</b>  | -0.170         | <b>-0.236</b> | -0.189          | -0.147         | -0.205         | -0.109         | 0.001           | 0.159          | -0.172                 | 0.080            |
|                      | p | <b>0.006</b>   | <b>0.006</b>   | <b>0.004</b>   | <b>0.012</b>   | <b>0.019</b>   | 0.121          | <b>0.030</b>  | 0.152           | 0.267          | 0.120          | 0.415          | 0.993           | 0.229          | 0.193                  | 0.545            |
|                      | n | <b>84</b>      | <b>84</b>      | <b>84</b>      | <b>84</b>      | <b>84</b>      | <b>84</b>      | <b>84</b>     | 59              | 59             | 59             | 59             | 59              | 59             | 59                     | 59               |
| Dyspnea              | r | <b>-0.286*</b> | <b>-0.273*</b> | <b>-0.270*</b> | <b>-0.226*</b> | <b>-0.317*</b> | -0.149*        | 0.083*        | -0.230*         | -0.212*        | -0.243*        | <b>-0.267*</b> | -0.169*         | -0.050*        | -0.069*                | 0.073*           |
|                      | p | <b>0.008</b>   | <b>0.011</b>   | <b>0.012</b>   | <b>0.036</b>   | <b>0.003</b>   | 0.170          | 0.447         | 0.077           | 0.104          | 0.062          | <b>0.041</b>   | 0.197           | 0.702          | 0.603                  | 0.581            |
|                      | n | <b>86</b>      | <b>86</b>      | <b>86</b>      | <b>86</b>      | <b>86</b>      | <b>86</b>      | <b>86</b>     | 60              | 60             | 60             | <b>60</b>      | 60              | 60             | 60                     | 60               |
| ILD                  | r | <b>-0.367*</b> | <b>-0.334*</b> | <b>-0.292*</b> | <b>-0.247*</b> | <b>-0.300*</b> | <b>-0.290*</b> | 0.093*        | -0.219*         | -0.025*        | -0.140*        | -0.057*        | -0.114*         | -0.117*        | 0.001*                 | 0.030*           |
|                      | p | <b>0.001</b>   | <b>0.002</b>   | <b>0.007</b>   | <b>0.023</b>   | <b>0.005</b>   | <b>0.007</b>   | 0.398         | 0.095           | 0.852          | 0.289          | 0.673          | 0.391           | 0.901          | 0.991                  | 0.820            |
|                      | n | <b>85</b>      | <b>85</b>      | <b>85</b>      | <b>85</b>      | <b>85</b>      | <b>85</b>      | <b>85</b>     | 59              | 59             | 59             | 59             | 59              | 59             | 59                     | 59               |
| DLCO                 | r | <b>0.301</b>   | <b>0.383</b>   | <b>0.396</b>   | <b>0.380</b>   | <b>0.361</b>   | <b>0.300</b>   | 0.157         | 0.187           | 0.086          | 0.231          | 0.171          | 0.174           | 0.152          | 0.247                  | 0.065            |
|                      | p | <b>0.007</b>   | <b>0.001</b>   | <b>0.001</b>   | <b>0.001</b>   | <b>0.001</b>   | <b>0.007</b>   | 0.164         | 0.168           | 0.529          | 0.086          | 0.212          | 0.201           | 0.265          | 0.066                  | 0.633            |
|                      | n | <b>80</b>      | <b>80</b>      | <b>80</b>      | <b>80</b>      | <b>80</b>      | <b>80</b>      | <b>80</b>     | 56              | 56             | 56             | 56             | 56              | 56             | 56                     | 56               |
| Dysphagia/pyrosis    | r | -0.138         | -0.175         | -0.175         | -0.071         | -0.151         | -0.183         | -0.014        | -0.173          | -0.042         | -0.037         | -0.039         | -0.221          | 0.067          | -0.095                 | 0.047            |
|                      | p | 0.205          | 0.107          | 0.106          | 0.517          | 0.165          | 0.092          | 0.899         | 0.186           | 0.749          | 0.780          | 0.768          | 0.089           | 0.611          | 0.471                  | 0.722            |
|                      | n | <b>86</b>      | <b>86</b>      | <b>86</b>      | <b>86</b>      | <b>86</b>      | <b>86</b>      | <b>86</b>     | 60              | 60             | 60             | 60             | 60              | 60             | 60                     | 60               |
| Obstipation/dyarrhea | r | <b>-0.264</b>  | -0.188         | -0.144         | -0.176         | -0.163         | -0.196         | 0.084         | -0.094          | -0.118         | -0.188         | <b>-0.270</b>  | -0.206          | 0.014          | -0.105                 | -0.102           |
|                      | p | <b>0.015</b>   | 0.085          | 0.187          | 0.106          | 0.136          | 0.072          | 0.447         | 0.479           | 0.374          | 0.155          | <b>0.040</b>   | 0.117           | 0.915          | 0.430                  | 0.441            |
|                      | n | <b>85</b>      | <b>85</b>      | <b>85</b>      | <b>85</b>      | <b>85</b>      | <b>85</b>      | <b>85</b>     | 59              | 59             | 59             | <b>59</b>      | 59              | 59             | 59                     | 59               |
| Antidepressants      | r | <b>-0.227*</b> | <b>-0.370*</b> | -0.216*        | <b>-0.245*</b> | <b>-0.361*</b> | <b>-0.218*</b> | 0.113*        | <b>-0.319*</b>  | <b>-0.281*</b> | -0.221*        | -0.187*        | <b>-0.398*</b>  | -0.244*        | <b>-0.303*</b>         | <b>-0.454*</b>   |
|                      | p | <b>0.047</b>   | <b>0.001</b>   | 0.060          | <b>0.032</b>   | <b>0.001</b>   | <b>0.050</b>   | 0.327         | <b>0.016</b>    | <b>0.036</b>   | 0.101          | 0.168          | <b>0.002</b>    | 0.070          | <b>0.023</b>           | <b>0.001</b>     |
|                      | n | <b>77</b>      | <b>77</b>      | <b>77</b>      | <b>77</b>      | <b>77</b>      | <b>77</b>      | <b>77</b>     | <b>56</b>       | <b>56</b>      | <b>56</b>      | <b>56</b>      | <b>56</b>       | <b>56</b>      | <b>56</b>              | <b>56</b>        |
| SSc limitations      | r | <b>-0.425*</b> | <b>-0.415*</b> | <b>-0.382*</b> | <b>-0.357*</b> | <b>-0.339*</b> | <b>-0.552*</b> | <b>0.393*</b> | <b>-0.473*</b>  | <b>-0.278*</b> | <b>-0.301*</b> | -0.232*        | <b>-0.326*</b>  | <b>-0.326*</b> | <b>-0.370*</b>         | <b>-0.328*</b>   |
|                      | p | <b>0.002</b>   | <b>0.002</b>   | <b>0.005</b>   | <b>0.009</b>   | <b>0.013</b>   | <b>0.001</b>   | <b>0.004</b>  | <b>0.001</b>    | <b>0.049</b>   | <b>0.032</b>   | 0.102          | <b>0.020</b>    | <b>0.019</b>   | <b>0.008</b>           | <b>0.019</b>     |
|                      | n | <b>53</b>      | <b>53</b>      | <b>53</b>      | <b>53</b>      | <b>53</b>      | <b>53</b>      | <b>53</b>     | <b>51</b>       | <b>51</b>      | <b>51</b>      | <b>51</b>      | <b>51</b>       | <b>51</b>      | <b>51</b>              | <b>51</b>        |
| Education            | r | <b>0.212*</b>  | <b>0.288*</b>  | <b>0.234*</b>  | <b>0.264*</b>  | <b>0.250*</b>  | 0.153*         | -0.060*       | 0.181*          | 0.152*         | <b>0.254*</b>  | 0.092*         | 0.038*          | 0.060*         | 0.237*                 | 0.112*           |
|                      | p | <b>0.050</b>   | <b>0.007</b>   | <b>0.030</b>   | <b>0.014</b>   | <b>0.020</b>   | 0.159          | 0.585         | 0.163           | 0.242          | <b>0.049</b>   | 0.484          | 0.773           | 0.644          | 0.066                  | 0.390            |
|                      | n | <b>86</b>      | <b>86</b>      | <b>86</b>      | <b>86</b>      | <b>86</b>      | <b>86</b>      | <b>86</b>     | 61              | 61             | <b>61</b>      | 61             | 61              | 61             | 61                     | 61               |
| Alcohol              | r | <b>0.396</b>   | <b>0.453</b>   | <b>0.791</b>   | <b>0.432</b>   | <b>0.420</b>   | <b>0.363</b>   | 0.142         | <b>0.314</b>    | <b>0.269</b>   | <b>0.431</b>   | <b>0.290</b>   | <b>0.289</b>    | 0.029          | 0.402                  | -0.063           |
|                      | p | <b>0.001</b>   | <b>0.001</b>   | <b>0.001</b>   | <b>0.001</b>   | <b>0.001</b>   | <b>0.001</b>   | 0.217         | <b>0.018</b>    | <b>0.045</b>   | <b>0.001</b>   | <b>0.030</b>   | <b>0.031</b>    | 0.849          | 0.002                  | 0.647            |
|                      | n | <b>77</b>      | <b>77</b>      | <b>77</b>      | <b>77</b>      | <b>77</b>      | <b>77</b>      | <b>77</b>     | <b>56</b>       | <b>56</b>      | <b>56</b>      | <b>56</b>      | <b>56</b>       | <b>56</b>      | <b>56</b>              | <b>56</b>        |
| SHAQ global          | r | -0.176         | <b>-0.320</b>  | <b>-0.268</b>  | -0.225         | <b>-0.274</b>  | <b>-0.291</b>  | 0.179         | <b>-0.369</b>   | <b>-0.446</b>  | -0.232         | <b>-0.380</b>  | <b>-0.363</b>   | <b>-0.414</b>  | <b>-0.438</b>          | <b>-0.424</b>    |
|                      | p | 0.131          | <b>0.005</b>   | <b>0.020</b>   | 0.053          | <b>0.017</b>   | <b>0.011</b>   | 0.125         | <b>0.008</b>    | <b>0.001</b>   | 0.105          | <b>0.007</b>   | <b>0.010</b>    | <b>0.003</b>   | <b>0.001</b>           | <b>0.002</b>     |
|                      | n | <b>75</b>      | <b>75</b>      | <b>75</b>      | <b>75</b>      | <b>75</b>      | <b>75</b>      | <b>75</b>     | <b>50</b>       | <b>50</b>      | <b>50</b>      | <b>50</b>      | <b>50</b>       | <b>50</b>      | <b>50</b>              | <b>50</b>        |
| HAQ                  | r | -0.161         | <b>-0.258</b>  | <b>-0.243</b>  | <b>-0.245</b>  | <b>-0.247</b>  | <b>-0.305</b>  | 0.162         | <b>-0.342</b>   | <b>-0.325</b>  | -0.177         | <b>-0.274</b>  | -0.239          | <b>-0.350</b>  | <b>-0.336</b>          | <b>-0.309</b>    |
|                      | p | 0.139          | <b>0.016</b>   | <b>0.024</b>   | <b>0.023</b>   | <b>0.022</b>   | <b>0.004</b>   | 0.137         | <b>0.008</b>    | <b>0.011</b>   | 0.177          | <b>0.036</b>   | 0.066           | <b>0.006</b>   | <b>0.009</b>           | <b>0.016</b>     |
|                      | n | <b>86</b>      | <b>86</b>      | <b>86</b>      | <b>86</b>      | <b>86</b>      | <b>86</b>      | <b>86</b>     | <b>60</b>       | <b>60</b>      | <b>60</b>      | <b>60</b>      | <b>60</b>       | <b>60</b>      | <b>60</b>              | <b>60</b>        |
| BDI-II               | r | <b>-0.387</b>  | <b>-0.446</b>  | <b>-0.438</b>  | <b>-0.352</b>  | <b>-0.398</b>  | <b>-0.425</b>  | <b>0.279</b>  | <b>-0.455</b>   | <b>-0.312</b>  | <b>-0.349</b>  | <b>-0.440</b>  | -0.211          | <b>-0.303</b>  | <b>-0.488</b>          | <b>-0.541</b>    |
|                      | p | <b>0.001</b>   | <b>0.001</b>   | <b>0.001</b>   | <b>0.001</b>   | <b>0.001</b>   | <b>0.001</b>   | <b>0.009</b>  | <b>0.001</b>    | <b>0.015</b>   | <b>0.006</b>   | <b>0.001</b>   | 0.106           | <b>0.018</b>   | <b>0.001</b>           | <b>0.001</b>     |
|                      | n | <b>86</b>      | <b>86</b>      | <b>86</b>      | <b>86</b>      | <b>86</b>      | <b>86</b>      | <b>86</b>     | <b>60</b>       | <b>60</b>      | <b>60</b>      | <b>60</b>      | <b>60</b>       | <b>60</b>      | <b>60</b>              | <b>60</b>        |
| FIS                  | r | <b>-0.358</b>  | <b>-0.453</b>  | <b>-0.397</b>  | <b>-0.365</b>  | <b>-0.438</b>  | <b>-0.437</b>  | 0.187         | <b>-0.401</b>   | <b>-0.377</b>  | <b>-0.321</b>  | <b>-0.420</b>  | <b>-0.259</b>   | -0.228         | <b>-0.540</b>          | <b>-0.373</b>    |
|                      | p | <b>0.001</b>   | <b>0.001</b>   | <b>0.001</b>   | <b>0.001</b>   | <b>0.001</b>   | <b>0.001</b>   | 0.082         | <b>0.001</b>    | <b>0.003</b>   | <b>0.012</b>   | <b>0.001</b>   | <b>0.044</b>    | 0.078          | <b>0.001</b>           | <b>0.003</b>     |
|                      | n | <b>87</b>      | <b>87</b>      | <b>87</b>      | <b>87</b>      | <b>87</b>      | <b>87</b>      | <b>87</b>     | <b>61</b>       | <b>61</b>      | <b>61</b>      | <b>61</b>      | <b>61</b>       | <b>61</b>      | <b>61</b>              | <b>61</b>        |
| HAP-AAS              | r | <b>0.451</b>   | <b>0.524</b>   | <b>0.531</b>   | <b>0.445</b>   | <b>0.447</b>   | <b>0.502</b>   | 0.010         | <b>0.311</b>    | <b>0.339</b>   | <b>0.316</b>   | <b>0.361</b>   | 0.135           | <b>0.286</b>   | <b>0.433</b>           | 0.168            |
|                      | p | <b>0.001</b>   | <b>0.001</b>   | <b>0.001</b>   | <b>0.001</b>   | <b>0.001</b>   | <b>0.001</b>   | 0.926         | <b>0.016</b>    | <b>0.008</b>   | <b>0.014</b>   | <b>0.005</b>   | 0.302           | <b>0.027</b>   | <b>0.001</b>           | 0.199            |
|                      | n | <b>86</b>      | <b>86</b>      | <b>86</b>      | <b>86</b>      | <b>86</b>      | <b>86</b>      | <b>86</b>     | <b>60</b>       | <b>60</b>      | <b>60</b>      | <b>60</b>      | <b>60</b>       | <b>60</b>      | <b>60</b>              | <b>60</b>        |
| SF-36 PCS            | r | <b>0.258</b>   | <b>0.310</b>   | <b>0.318</b>   | <b>0.246</b>   | <b>0.308</b>   | <b>0.294</b>   | -0.120        | <b>0.322</b>    | <b>0.404</b>   | <b>0.275</b>   | <b>0.355</b>   | 0.204           | <b>0.335</b>   | <b>0.421</b>           | 0.188            |
|                      | p | <b>0.017</b>   | <b>0.004</b>   | <b>0.003</b>   | <b>0.023</b>   | <b>0.004</b>   | <b>0.008</b>   | 0.272         | <b>0.012</b>    | <b>0.001</b>   | <b>0.033</b>   | <b>0.006</b>   | 0.118           | <b>0.009</b>   | <b>0.001</b>           | 0.150            |
|                      | n | <b>85</b>      | <b>85</b>      | <b>85</b>      | <b>85</b>      | <b>85</b>      | <b>85</b>      | <b>85</b>     | <b>60</b>       | <b>60</b>      | <b>60</b>      | <b>60</b>      | <b>60</b>       | <b>60</b>      | <b>60</b>              | <b>60</b>        |
| SF-36 MCS            | r | <b>0.239</b>   | <b>0.352</b>   | <b>0.274</b>   | 0.207          | <b>0.295</b>   | <b>0.269</b>   | <b>-0.235</b> | <b>0.275</b>    | <b>0.262</b>   | <b>0.282</b>   | <b>0.299</b>   | 0.186           | 0.222          | <b>0.401</b>           | <b>0.379</b>     |
|                      | p | <b>0.027</b>   | <b>0.001</b>   | <b>0.011</b>   | 0.057          | <b>0.006</b>   | <b>0.013</b>   | <b>0.030</b>  | <b>0.034</b>    | <b>0.043</b>   | <b>0.029</b>   | <b>0.021</b>   | 0.154           | 0.089          | <b>0.002</b>           | <b>0.003</b>     |
|                      | n | <b>85</b>      | <b>85</b>      | <b>85</b>      | <b>85</b>      | <b>85</b>      | <b>85</b>      | <b>85</b>     | <b>60</b>       | <b>60</b>      | <b>60</b>      | <b>60</b>      | <b>60</b>       | <b>60</b>      | <b>60</b>              | <b>60</b>        |

**Acronyms:** Statistically significant correlations ( $p < 0.05$ ) are marked in bold. Pearson's correlation coefficients are marked with \*. SSc, systemic sclerosis; ESSG, European Scleroderma Study Group; ESR, erythrocyte sedimentation rate; ILD, interstitial lung disease; DLCO, diffusing capacity of the lungs for carbon monoxide; SSc limitations, the presence of difficulties associated with systemic sclerosis limiting sexual activity; HAQ, Health Assessment Questionnaire; SHAQ Global, Scleroderma Health Assessment Questionnaire – Global Score, aggregated score of HAQ and SHAQ; HAP AAS, Human Activity Profile Adjusted Activity Score; FIS, Fatigue Impact Scale; BDI-II, Beck's Depression Inventory-II; SF-36 MCS, Medical outcomes study Short Form 36 - Mental Component Summary; SF-36 PCS, Medical outcomes study Short Form 36 - Physical Component Summary; FSFI, Female Sexual Function Index; BISF-W, Brief Index of Sexual Function for Women; SQoL-F, Sexual Quality of Life - Female; PFIQ-7, Pelvic Floor Impact Questionnaire – short form 7; PISQ-12, Pelvic Organ Prolapse/Urinary Incontinence Sexual Questionnaire short form.

**Supplementary Table S3: Multivariate regression analysis predicting sexual function and pelvic floor function in female patients with SSc based on clinical features**

|                     | $\beta$ (95% CI)           | Stand. $\beta$ | $p$               | Adjusted $R^2$ | $p^*$             |
|---------------------|----------------------------|----------------|-------------------|----------------|-------------------|
| <b>FSFI</b>         |                            |                |                   |                |                   |
| Overall model       |                            |                |                   | 0.178          | <b>0.017</b>      |
| Disease duration    | -0.266 (-0.686; 0.154)     | -0.161         | 0.210             |                |                   |
| mRSS                | 0.116 (-0.175; 0.407)      | 0.110          | 0.426             |                |                   |
| ESSG activity index | -1.914 (-4.041; 0.212)     | -0.254         | 0.077             |                |                   |
| ESR                 | -0.029 (-0.187; 0.129)     | -0.053         | 0.710             |                |                   |
| DLCO                | 0.047 (-0.120; 0.214)      | 0.090          | 0.575             |                |                   |
| SHAQ-Global         | -7.183 (-12.301; -2.066)   | -0.338         | <b>0.007</b>      |                |                   |
| dysphagia/pyrosis   | -1.512 (-7.641; 4.617)     | -0.065         | 0.623             |                |                   |
| obstipation/diarhea | -2.026 (-8.425; 4.373)     | -0.077         | 0.528             |                |                   |
| PAH                 | 6.503 (-0.624; 13.631)     | 0.229          | 0.073             |                |                   |
| <b>BISF-W</b>       |                            |                |                   |                |                   |
| Overall model       |                            |                |                   | 0.148          | <b>0.003</b>      |
| Disease duration    | -0.133 (-0.796; 0.530)     | -0.052         | 0.688             |                |                   |
| mRSS                | 0.359 (-0.100; 0.817)      | 0.218          | 0.123             |                |                   |
| ESSG activity index | -3.287 (-6.661; 0.087)     | -0.277         | 0.056             |                |                   |
| ESR                 | -0.166 (-0.411; 0.078)     | -0.195         | 0.178             |                |                   |
| DLCO                | 0.025 (-0.241; 0.291)      | 0.030          | 0.852             |                |                   |
| SHAQ-Global         | -9.713 (-17.629; -1.797)   | -0.300         | <b>0.017</b>      |                |                   |
| dysphagia/pyrosis   | 0.241 (-9.507; 9.989)      | 0.007          | 0.961             |                |                   |
| obstipation/diarhea | -6.871 (-17.010; 3.268)    | -0.170         | 0.180             |                |                   |
| PAH                 | 5.299 (-5.976; 16.573)     | 0.121          | 0.350             |                |                   |
| <b>SQoL-F</b>       |                            |                |                   |                |                   |
| Overall model       |                            |                |                   | 0.376          | <b>&lt;0.0001</b> |
| Disease duration    | 0.002 (-0.917; 0.920)      | 0.000          | 0.997             |                |                   |
| mRSS                | 0.863 (0.213; 1.514)       | 0.330          | <b>0.010</b>      |                |                   |
| ESSG activity index | -9.561 (-14.270; -4.851)   | -0.507         | <b>&lt;0.0001</b> |                |                   |
| ESR                 | 0.069 (-0.274; 0.412)      | 0.052          | 0.689             |                |                   |
| DLCO                | -0.023 (-0.404; 0.358)     | -0.018         | 0.903             |                |                   |
| SHAQ-Global         | -26.768 (-37.934; -15.601) | -0.521         | <b>&lt;0.0001</b> |                |                   |
| dysphagia/pyrosis   | -0.658 (-14.118; 12.803)   | -0.012         | 0.922             |                |                   |
| obstipation/diarhea | -1.541 (-15.836; 12.754)   | -0.024         | 0.829             |                |                   |
| PAH                 | 10.814 (-4.759; 26.387)    | 0.159          | 0.169             |                |                   |
| <b>PISQ-12</b>      |                            |                |                   |                |                   |
| Overall model       |                            |                |                   | 0.179          | <b>0.004</b>      |
| Disease duration    | 0.006 (-0.213; 0.225)      | 0.007          | 0.957             |                |                   |
| mRSS                | -0.169 (-0.338; 0.001)     | -0.304         | 0.051             |                |                   |
| ESSG activity index | 1.697 (0.501; 2.894)       | 0.438          | <b>0.006</b>      |                |                   |
| ESR                 | -0.017 (-0.098; 0.065)     | -0.061         | 0.683             |                |                   |
| DLCO                | 0.016 (-0.080; 0.111)      | 0.058          | 0.744             |                |                   |
| SHAQ-Global         | 2.904 (0.211; 5.597)       | 0.275          | <b>0.035</b>      |                |                   |
| dysphagia/pyrosis   | 1.169 (-2.079; 4.417)      | 0.100          | 0.473             |                |                   |
| obstipation/diarhea | 4.237 (0.851; 7.622)       | 0.319          | <b>0.015</b>      |                |                   |
| PAH                 | 0.321 (-3.629; 4.270)      | 0.022          | 0.871             |                |                   |
| <b>PFIQ-7</b>       |                            |                |                   |                |                   |
| Overall model       |                            |                |                   | 0.057          | 0.060             |
| Disease duration    | -0.477 (-2.544; 1.589)     | -0.062         | 0.645             |                |                   |
| mRSS                | -0.795 (-2.222; 0.632)     | -0.161         | 0.269             |                |                   |
| ESSG activity index | 0.693 (-9.756; 11.143)     | 0.020          | 0.895             |                |                   |
| ESR                 | -0.699 (-1.463; 0.064)     | -0.273         | 0.072             |                |                   |
| DLCO                | -0.862 (-1.686; -0.037)    | -0.354         | <b>0.041</b>      |                |                   |
| SHAQ-Global         | 16.972 (-7.721; 41.666)    | 0.174          | 0.174             |                |                   |

|                     |                           |        |       |
|---------------------|---------------------------|--------|-------|
| dysphagia/pyrosis   | 9.051 (-20.988; 39.090)   | 0.084  | 0.548 |
| obstipation/diarhea | 7.254 (-23.109; 37.616)   | 0.061  | 0.634 |
| PAH                 | -16.010 (-51.150; 19.130) | -0.121 | 0.365 |

**Acronyms:** Statistical significance ( $p < 0.05$ ) is marked in bold.  $\beta$ , regression beta coefficient; stand.  $\beta$ , standardized regression beta coefficient; CI, confidence interval; p, p-value of the predictor in the model; Adjusted  $R^2$ , R-squared adjusted for the number of predictors in the model;  $p^*$ , p-value for the overall model; SSc, systemic sclerosis; FSFI, Female Sexual Function Index; BISF-W, Brief Index of Sexual Function for Women; SQoL-F, Sexual Quality of Life – Female; PISQ-12, Pelvic Organ Prolapse/Urinary Incontinence Sexual Questionnaire short form; PFIQ-7, Pelvic Floor Impact Questionnaire – short form 7; ESSG, European Scleroderma Study Group; ESR, erythrocyte sedimentation rate; mRSS, modified Rodnan Skin Score; DLCO, diffusing capacity of the lungs for carbon monoxide; PAH, pulmonary arterial hypertension; SHAQ Global, Scleroderma Health Assessment Questionnaire – Global Score; SHAQ, Scleroderma Health Assessment Questionnaire – a total score of five visual analog scales; FIS, Fatigue Impact Scale, HAP AAS, Human Activity Profile Adjusted Activity Score.

**Supplementary Table S4. Sexual function and pelvic floor function in SSc patients with low and high disease activity assessed by European Scleroderma Study Group Activity Index**

| Parameters (score range worst-best)                       | SSc ESSG $\leq 3$<br>(n = 68) | SSc ESSG $> 3$<br>(n = 22) | p-value                       |
|-----------------------------------------------------------|-------------------------------|----------------------------|-------------------------------|
| <b>FSFI total (range 2-36)</b>                            | 19.4 (3.9-29.6)               | 13.8 (4.2-22.4)            | $p = 0.181$                   |
| FSFI desire (range 1.2-6)                                 | 2.4 (1.2-3.6)                 | 2.4 (1.7-3.6)              | $p = 0.992$                   |
| FSFI arousal (range 0-6)                                  | 3.0 (1.2-4.8)                 | 1.5 (0.0-3.6)              | <b><math>p = 0.024</math></b> |
| FSFI lubrication (range 0-6)                              | 3.6 (0.3-5.4)                 | 1.7 (0.0-5.1)              | $p = 0.137$                   |
| FSFI orgasm (range 0-6)                                   | 3.2 (0.0-5.2)                 | 2.6 (0.0-3.8)              | $p = 0.202$                   |
| FSFI satisfaction (range 0.8-6)                           | 3.6 (1.2-5.2)                 | 1.8 (0.8-4.1)              | $p = 0.068$                   |
| FSFI pain (range 0-6)                                     | 3.6 (0.0-6.0)                 | 1.0 (0.0-5.2)              | $p = 0.183$                   |
| <b>BISF-W total (range -16-75)</b>                        | 18.5 (3.4-35.7)               | 7.2 (0.3-27.5)             | $p = 0.092$                   |
| BISF-W thoughts/desire (range 0-12)                       | 3.1 (0.6-5.9)                 | 4.1 (1.1-5.7)              | $p = 0.747$                   |
| BISF-W arousal (range 0-12)                               | 4.3 (0.4-7.4)                 | 0.9 (0.0-6.3)              | $p = 0.126$                   |
| BISF-W frequency of sexual activity (range 0-12)          | 1.8 (0.4-4.3)                 | 0.8 (0.0-3.0)              | $p = 0.185$                   |
| BISF-W receptivity/initiation (range 0-15)                | 6.0 (0.0-9.5)                 | 2.0 (0.0-9.0)              | $p = 0.145$                   |
| BISF-W pleasure/orgasm (range 0-12)                       | 3.3 (0.2-6.3)                 | 0.6 (0.0-3.5)              | <b><math>p = 0.023</math></b> |
| BISF-W relationship satisfaction (range 0-12)             | 6.0 (3.0-9.5)                 | 4.0 (1.8-7.0)              | <b><math>p = 0.046</math></b> |
| BISF-W problems affecting sexual function (range 16-0)    | 4.2 (3.0-6.6)                 | 4.6 (3.6-6.7)              | $p = 0.451$                   |
| SFQ-28 desire (range 5-31)                                | 17.0 (12.0-20.0)              | 16.0 (11.5-17.8)           | $p = 0.406$                   |
| SFQ-28 arousal sensation (range 4-20)                     | 10.0 (8.5-13.5)               | 8.0 (5.0-12.0)             | $p = 0.080$                   |
| SFQ-28 arousal lubrication (range 2-10)                   | 5.0 (4.0-7.0)                 | 6.0 (2.5-7.0)              | $p = 0.864$                   |
| SFQ-28 arousal cognitive (range 2-10)                     | 5.0 (4.0-6.0)                 | 5.0 (2.5-6.0)              | $p = 0.300$                   |
| SFQ-28 orgasm (range 1-15)                                | 10.0 (6.0-12.0)               | 10.0 (6.3-11.0)            | $p = 0.844$                   |
| SFQ-28 pain (range 2-15)                                  | 13.0 (10.0-15.0)              | 11.0 (7.5-14.3)            | $p = 0.303$                   |
| SFQ-28 enjoyment (range 6-30)                             | 19.0 (14.5-24.0)              | 15.0 (9.0-22.5)            | $p = 0.271$                   |
| SFQ-28 partner (range 2-10)                               | 9.0 (8.0-10.0)                | 9.0 (5.8-10.0)             | $p = 0.751$                   |
| <b>SQoL-F (range 0-100)</b>                               | 64.4 (37.8-92.2)              | 48.3 (32.5-62.2)           | <b><math>p = 0.032</math></b> |
| <b>PISQ-12 (range 48-0)</b>                               | 11.0 (8.0-16.0)               | 15.5 (11.5-19.0)           | <b><math>p = 0.010</math></b> |
| <b>PFIQ-7 total (range 300-0), mean<math>\pm</math>SD</b> | 30.7 $\pm$ 47.4               | 35.3 $\pm$ 51.9            | $p = 0.532$                   |
| PFIQ-7 bladder/urine (range 100-0)                        | 14.8 $\pm$ 24.7               | 13.6 $\pm$ 20.5            | $p = 0.791$                   |
| PFIQ-7 bowel/rectum (range 100-0)                         | 10.4 $\pm$ 22.9               | 15.2 $\pm$ 22.4            | $p = 0.203$                   |
| PFIQ-7 vagina/pelvis (range 100-0)                        | 5.5 $\pm$ 11.4                | 5.5 $\pm$ 17.0             | $p = 0.819$                   |

**Acronyms:** Data are presented as median (IQR), if not stated otherwise. Statistically significant differences ( $p < 0.05$ ) are marked in bold. The number of respondents to the SFQ-28 questionnaire was 49 for SSc patients with ESSG  $\leq 3$  and 12 for SSc patients with ESSG  $> 3$ ; ESSG, European Scleroderma Study Group Activity Index; IQR, inter-quartile range; SD, standard deviation; SSc, systemic sclerosis; FSFI, Female Sexual Function Index; BISF-W, Brief Index of Sexual Function for Women; SFQ-28, Sexual Function Questionnaire; SQoL-F, Sexual Quality of Life - Female; PISQ-12, Pelvic Organ Prolapse/Urinary Incontinence Sexual Questionnaire short form; PFIQ-7, Pelvic Floor Impact Questionnaire – short form 7.

## **SUPPLEMENTARY REFERENCES**

1. World Health Organization, Canada CPHAo. Preventing chronic diseases: a vital investment: World Health Organization; 2005.
2. Steen VD, Medsger Jr TA. The value of the Health Assessment Questionnaire and special patient-generated scales to demonstrate change in systemic sclerosis patients over time. *Arthritis Rheum.* 1997;40(11):1984-91.
3. Georges C, Chassany O, Mouthon L, Tiev K, Toledano C, Meyer O, et al. Validation of French version of the scleroderma health assessment questionnaire (SSc HAQ). *Clin Rheumatol.* 2005;24(1):3-10.
